# Supplementary material
Source: publisher site journal article supplement (https://static.cambridge.org/content/id/urn:cambridge.org:id:article:S1368980020001548/resource/name/S1368980020001548supp001.pdf)
Supplement: Supplementary file 1 [file S1368980020001548supp001.pdf]

Supplementary Table 1 Food group intakes for the quartiles of each dietary pattern (g/4184 kJ)

|                             | Healthy Japanese pattern |       |      |      |      |      |       |      |                     |      | Sweets-fat pattern |      |      |      |      |      |      |                     | Seafood and Alcohol pattern |      |      |      |      |      |      |       |                     |
|-----------------------------|--------------------------|-------|------|------|------|------|-------|------|---------------------|------|--------------------|------|------|------|------|------|------|---------------------|-----------------------------|------|------|------|------|------|------|-------|---------------------|
|                             | Q1                       |       | Q2   |      | Q3   |      | Q4    |      | <i>P</i> for trend† | Q1   |                    | Q2   |      | Q3   |      | Q4   |      | <i>P</i> for trend† | Q1                          |      | Q2   |      | Q3   |      | Q4   |       | <i>P</i> for trend† |
|                             | Mean                     | SD    | Mean | SD   | Mean | SD   | Mean  | SD   |                     | Mean | SD                 | Mean | SD   | Mean | SD   | Mean | SD   |                     | Mean                        | SD   | Mean | SD   | Mean | SD   | Mean | SD    |                     |
| Cereals                     | 251                      | 95    | 220  | 60   | 201  | 51   | 181   | 54   | <0.001              | 274  | 86                 | 224  | 50   | 197  | 43   | 158  | 45   | <0.001              | 228                         | 94   | 217  | 60   | 210  | 61   | 197  | 64    | <0.001              |
| Potatoes                    | 16.8                     | 13.4  | 24.1 | 16.4 | 33.0 | 17.5 | 37.8  | 22.8 | <0.001              | 23.8 | 17.7               | 29.3 | 19.8 | 30.6 | 20.7 | 27.9 | 19.4 | 0.007               | 25.6                        | 20.3 | 29.0 | 19.4 | 30.2 | 20.0 | 26.8 | 18.3  | 0.179               |
| Sugars                      | 2.0                      | 2.0   | 2.2  | 1.6  | 2.6  | 1.8  | 2.7   | 1.6  | <0.001              | 2.3  | 1.7                | 2.4  | 1.5  | 2.4  | 1.6  | 2.4  | 2.3  | 0.980               | 2.3                         | 2.0  | 2.5  | 1.8  | 2.3  | 1.6  | 2.4  | 1.9   | 0.300               |
| Pulses                      | 18.7                     | 16.1  | 30.3 | 17.0 | 36.1 | 20.4 | 46.1  | 24.9 | <0.001              | 33.3 | 23.6               | 34.0 | 21.0 | 33.4 | 20.5 | 30.6 | 23.6 | 0.192               | 30.6                        | 25.3 | 32.3 | 22.8 | 32.8 | 20.3 | 35.6 | 19.8  | <0.001              |
| Green and yellow vegetables | 33.6                     | 21.3  | 49.7 | 19.6 | 63.7 | 25.2 | 105.9 | 47.4 | <0.001              | 61.0 | 49.1               | 66.6 | 35.9 | 63.5 | 35.4 | 61.7 | 40.2 | 0.760               | 67.7                        | 51.5 | 61.4 | 33.7 | 60.0 | 38.5 | 63.7 | 35.9  | 0.388               |
| Other Vegetables            | 41.4                     | 19.6  | 69.4 | 20.4 | 92.0 | 22.4 | 153.5 | 53.0 | <0.001              | 89.0 | 61.1               | 92.5 | 51.4 | 90.5 | 47.2 | 84.1 | 47.9 | 0.091               | 102.0                       | 67.8 | 87.9 | 47.5 | 82.7 | 43.9 | 83.6 | 43.7  | 0.001               |
| Fruits                      | 62.2                     | 55.1  | 69.2 | 43.2 | 82.4 | 54.0 | 94.2  | 63.7 | <0.001              | 59.1 | 43.0               | 77.1 | 47.6 | 81.3 | 54.0 | 90.4 | 70.1 | <0.001              | 74.2                        | 63.3 | 76.8 | 49.2 | 83.1 | 54.1 | 73.9 | 55.3  | 0.546               |
| Mushrooms                   | 3.7                      | 3.0   | 5.6  | 3.6  | 8.5  | 4.8  | 13.0  | 6.4  | <0.001              | 8.4  | 6.9                | 7.7  | 5.4  | 8.1  | 5.6  | 6.6  | 5.0  | 0.002               | 7.6                         | 6.3  | 8.0  | 5.9  | 7.4  | 5.0  | 7.8  | 5.9   | 0.580               |
| Seaweeds                    | 3.0                      | 3.3   | 4.9  | 4.2  | 6.8  | 4.7  | 11.5  | 7.5  | <0.001              | 7.3  | 7.2                | 6.6  | 5.7  | 6.4  | 5.1  | 5.8  | 6.0  | 0.001               | 6.3                         | 6.5  | 6.2  | 5.9  | 6.9  | 6.0  | 6.7  | 5.8   | 0.143               |
| Fish and shellfish          | 27.3                     | 16.1  | 38.7 | 18.2 | 50.0 | 21.9 | 54.1  | 28.3 | <0.001              | 44.7 | 27.5               | 45.4 | 23.9 | 42.2 | 22.0 | 37.9 | 21.5 | <0.001              | 26.2                        | 13.3 | 37.5 | 15.0 | 45.4 | 19.4 | 61.0 | 29.7  | <0.001              |
| Meat                        | 34.8                     | 17.1  | 41.7 | 18.9 | 42.5 | 16.2 | 43.8  | 18.5 | <0.001              | 33.5 | 16.9               | 41.6 | 16.2 | 44.1 | 18.6 | 43.5 | 18.3 | <0.001              | 34.2                        | 16.4 | 42.2 | 17.9 | 41.4 | 17.6 | 45.0 | 18.5  | <0.001              |
| Eggs                        | 15.8                     | 11.0  | 19.4 | 11.7 | 19.8 | 11.8 | 19.1  | 11.5 | <0.001              | 15.5 | 11.0               | 19.1 | 11.4 | 19.5 | 11.3 | 20.0 | 12.2 | <0.001              | 17.3                        | 12.4 | 18.4 | 10.5 | 19.9 | 11.6 | 18.5 | 11.8  | 0.031               |
| Dairy products              | 59.4                     | 51.9  | 76.1 | 53.4 | 79.8 | 49.6 | 84.7  | 58.9 | <0.001              | 73.6 | 62.1               | 74.9 | 51.1 | 75.2 | 52.1 | 76.5 | 51.5 | 0.589               | 79.1                        | 57.7 | 80.2 | 48.7 | 74.4 | 55.3 | 66.4 | 54.5  | 0.005               |
| Fats and oils               | 5.2                      | 2.7   | 5.7  | 2.2  | 5.7  | 2.1  | 5.5   | 2.5  | 0.312               | 4.8  | 2.5                | 5.5  | 2.3  | 5.8  | 2.2  | 5.9  | 2.4  | <0.001              | 4.7                         | 2.4  | 5.6  | 2.2  | 5.8  | 2.2  | 6.1  | 2.5   | <0.001              |
| Confectioneries             | 41.1                     | 26.3  | 37.2 | 20.8 | 33.3 | 18.5 | 29.2  | 17.3 | <0.001              | 20.1 | 12.8               | 28.5 | 14.0 | 38.3 | 15.6 | 53.9 | 24.6 | <0.001              | 43.0                        | 26.8 | 36.4 | 19.0 | 34.3 | 19.0 | 27.2 | 16.7  | <0.001              |
| Non-alcoholic beverages     | 302                      | 214   | 314  | 189  | 351  | 217  | 368   | 226  | <0.001              | 292  | 215                | 336  | 195  | 332  | 193  | 374  | 240  | <0.001              | 315                         | 204  | 323  | 181  | 340  | 208  | 356  | 253   | 0.025               |
| Alcoholic beverages         | 55.6                     | 136.1 | 38.4 | 77.0 | 35.5 | 75.9 | 20.9  | 59.3 | <0.001              | 57.6 | 139.6              | 40.8 | 71.9 | 32.0 | 80.0 | 20.0 | 50.4 | <0.001              | 12.8                        | 31.0 | 16.1 | 32.8 | 28.2 | 59.4 | 93.2 | 156.4 | <0.001              |

† Linear regression analysis, assigning ordinal numbers 0-3 to quartile categories of each dietary pattern.
